# Supplementary material for: Characterization of an interplay between a Mycobacterium tuberculosis MazF homolog, Rv1495 and its sole DNA topoisomerase I
Source: PubMed Central journal article supplement — Nucleic Acids Res. 2010 Aug 19;38(22):8219–30. doi: 10.1093/nar/gkq737 (PMC3001090; doi:10.1093/nar/gkq737), 2010-08-19
Supplement: supp_gkq737_Table_S1.pdf [file supp_gkq737_Table_S1.pdf]

**Table S1. Sequences of PCR primers used in this work**

| Gene                              | Forward(5'→3')             | Reverse(5'→3')               |
|-----------------------------------|----------------------------|------------------------------|
| Rv1495                            | ATATGAATTCCCGTGAACGCGCCGT  | AGCTTCTAGATCATGGCCACGGTAGCC  |
| ( <i>EcoR</i> I + <i>Xba</i> I )  | TGCGT                      | CCA                          |
| Rv1495-N56                        | ATATGAATTCCCGTGAACGCGCCGT  | ATATTCTAGATCAGCTGGGGCCCATGG  |
|                                   | TGCGT                      | CGA                          |
| Rv1495-N28                        | GGATCCTAAGATCTTAGGCGCGCCG  | GGATCCTCAGGCGTTGTTGGAGACGAT  |
|                                   | GATCT                      | GAG                          |
| Rv1495                            | ATATGGATCCCGTGAACGCGCCGTTG | AGACACTAGTTCATGGCCACGGTAGCC  |
| ( <i>Bam</i> H I + <i>Spe</i> I ) | CGTG                       | CC                           |
| Rv1495-N(29-56)                   | ATACCATATGGCCGTGCGCAACCGT  | ATATACTAGTTCAGGGGCCCATGGCGA  |
|                                   | CACA                       | CC                           |
| Rv3646c                           | GACCGAATTCAATTGGCTGACCCGA  | AATTAATCTAGACTAGTCGCGCTTGCT  |
|                                   | AAACGAA                    | GCCT                         |
| Rv3646c-NTD                       | GACCGAATTCGATTGGCTGACCCGA  | ATATCTAGATCATCGGGCTACCGAATC  |
|                                   | AAACGAA                    | GGCA                         |
| Rv3646c-CTD                       | ATAGGAATTCGAATGTCGGGTGGCC  | AATTAATCTAGACTAGTCGCGCTTGCT  |
|                                   | TCAAGAA                    | GCCT                         |
| MSMEG_6157                        | GATCGAATTCATAGTGGAGCGTTGG  | GGTATCTCTAGATTCGGCGGAAACCTA  |
|                                   | CACAGTTGGCT                | GGCCTTCTT                    |
| Rv0054                            | ATAAGAATTCAAGTGGCTGGTGACA  | ATAATCTAGAGGTCAGAATGGCGGTTTC |
|                                   | CCACCAT                    | GTCAT                        |
