# Supplementary material for: Characterization of an interplay between a Mycobacterium tuberculosis MazF homolog, Rv1495 and its sole DNA topoisomerase I
Source: PubMed Central journal article supplement — Nucleic Acids Res. 2010 Aug 19;38(22):8219–30. doi: 10.1093/nar/gkq737 (PMC3001090; doi:10.1093/nar/gkq737), 2010-08-19
Supplement: supp_gkq737_Table_S2.pdf [file supp_gkq737_Table_S2.pdf]

**Table S2. Plasmids used in this work for bacterial-two-hybrid or expression protein**

| Plasmid               | Relevant features                                    | Reference or source |
|-----------------------|------------------------------------------------------|---------------------|
| pBT-Rv1495            | Rv1495 gene cloned in pBT                            | This work           |
| pBT-Rv1495-N56        | The N-terminal 171bp of Rv1495 gene cloned in pBT    | This work           |
| pBT-Rv1495-N28        | The N-terminal 87 bp of Rv1495 gene cloned in pBT    | This work           |
| pET-Rv1495            | Rv1495 gene cloned in pET                            | This work           |
| pET-Rv1495-N56        | The N-terminal 171bp of Rv1495 gene cloned in pET    | This work           |
| pGEX-Rv1495           | Rv1495 gene cloned in pGEX                           | This work           |
| pMind-Rv1495          | Rv1495 gene cloned in pMind                          | This work           |
| pMind-Rv1495-N(29-56) | The fragment 85-171bp of Rv1495 gene cloned in pMind | This work           |
| pTRG-MtbTopA          | Rv3646c gene cloned in pTRG                          | This work           |
| pTRG-NTD              | The N-terminal 1863bp of Rv3646c gene cloned in pTRG | This work           |
| pTRG-CTD              | The C-terminal 939bp of Rv3646c gene cloned in pTRG  | This work           |
| pET-MtbTopA           | Rv3646c gene cloned in pET                           | This work           |
| pET-NTD               | The N-terminal 1863bp of Rv3646c gene cloned in pET  | This work           |
| pET-CTD               | The C-terminal 939bp of Rv3646c gene cloned in pET   | This work           |
| pTRG-MsmTopA          | MSMEG_6157 gene cloned in pTRG                       | This work           |
| pET-MsmTopA           | MSMEG_6157 gene cloned in pET                        | This work           |
| pBT-Rv0054            | Rv0054 gene cloned in pBT                            | This work           |
| pTRG-Rv0054           | Rv0054 gene cloned in pTRG                           | This work           |
| pET-Rv0054            | Rv0054 gene cloned in pET                            | This work           |
